# Supplementary material
Source: MDPI journal article supplement (https://www.mdpi.com/2073-445X/10/3/274)
Supplement: s1 [file s1]

Supplementary material Figure S2: overview of the results.

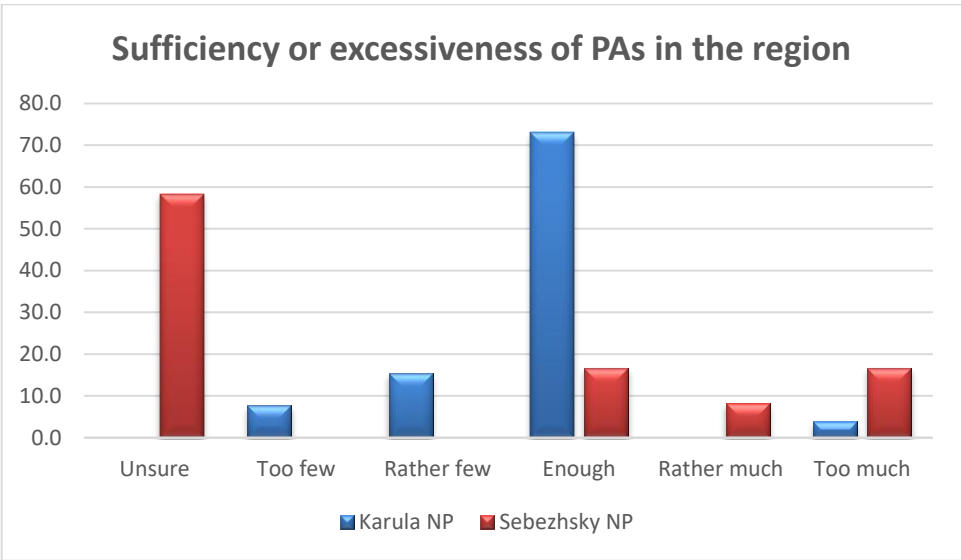

Graphical presentation of the answers to question no 3: What do You think of the amount/number/surface of protected areas in Estonia/Pskov Region?

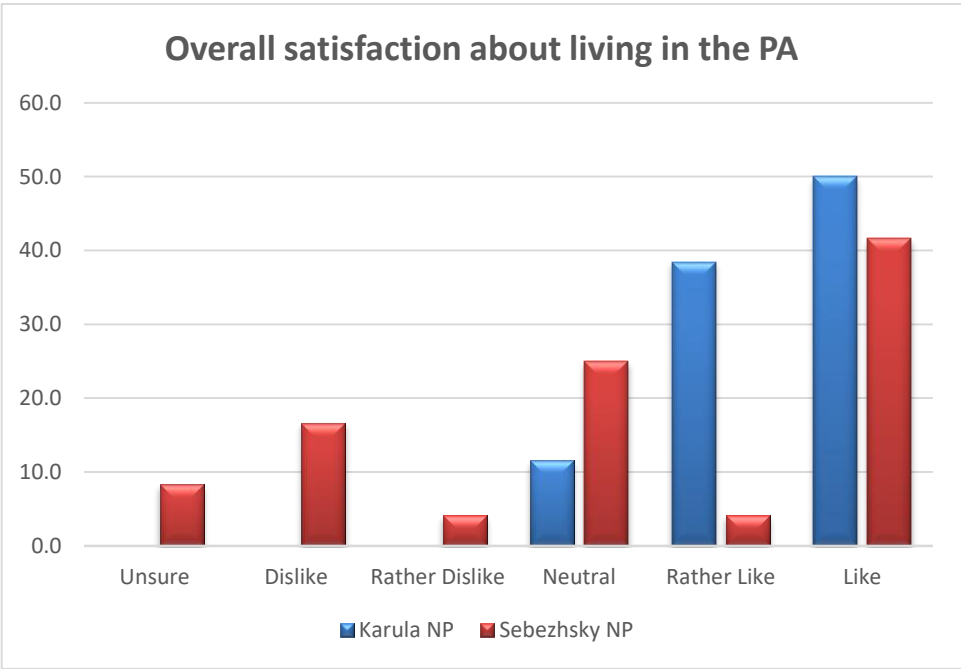

Graphical presentation of the answers to question no 4: Do you like that your residence is located in a protected area?

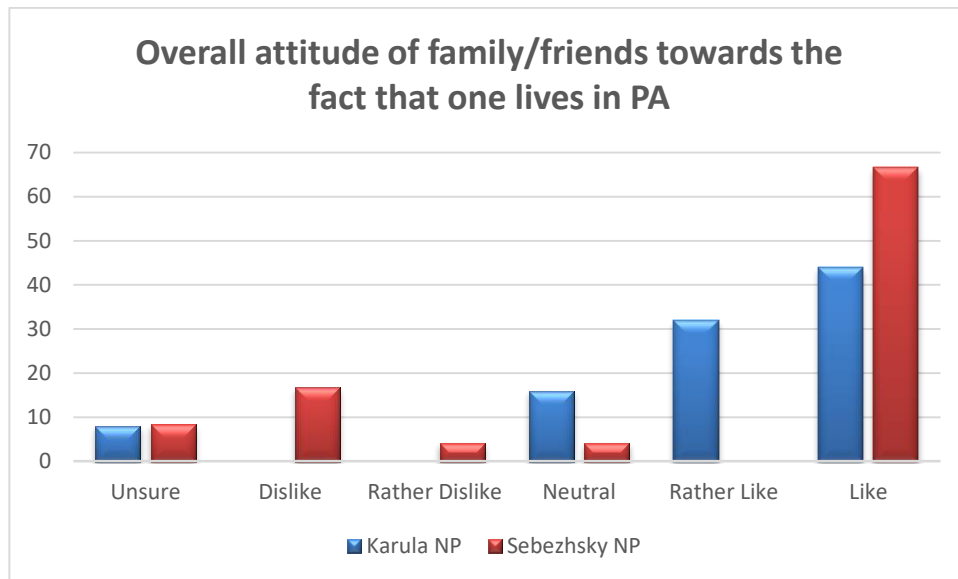

Graphical presentation of the answers to question no 5: Do your friends/ family/ acquaintances living elsewhere like that your residence is located in a protected area?

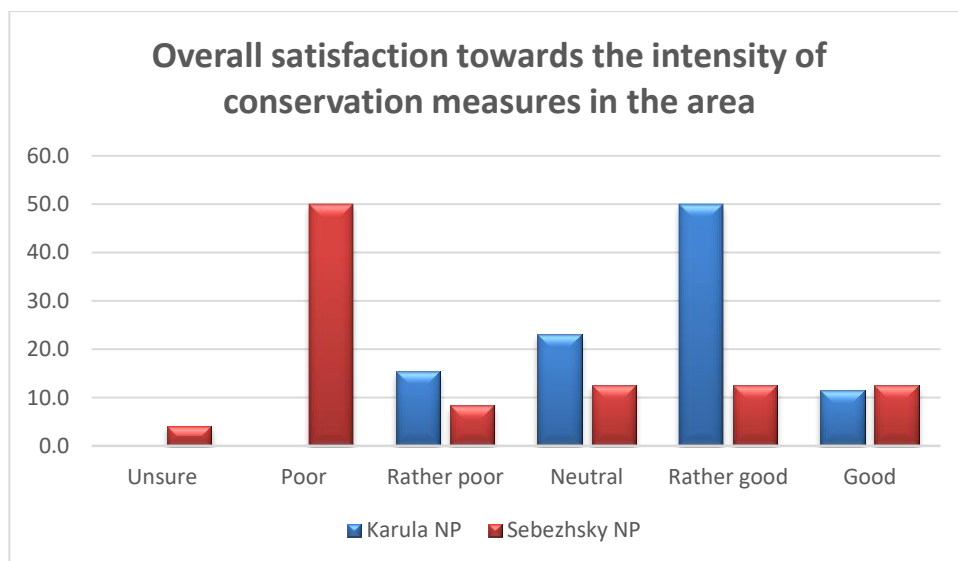

Graphical presentation of the answers to question no 6: How do you rank nature/environment protection activities in your home region?

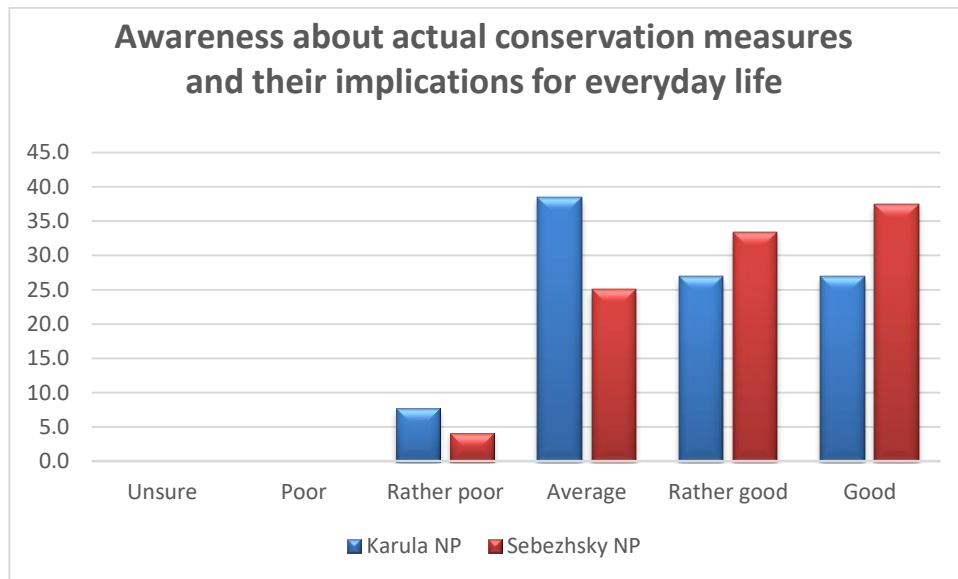

Graphical presentation of the answers to question no 7: Please rank your knowledge about nature protection rules and restrictions which are in force in your home region (How well do you know nature protection rules and restrictions which are in force in your home region?)

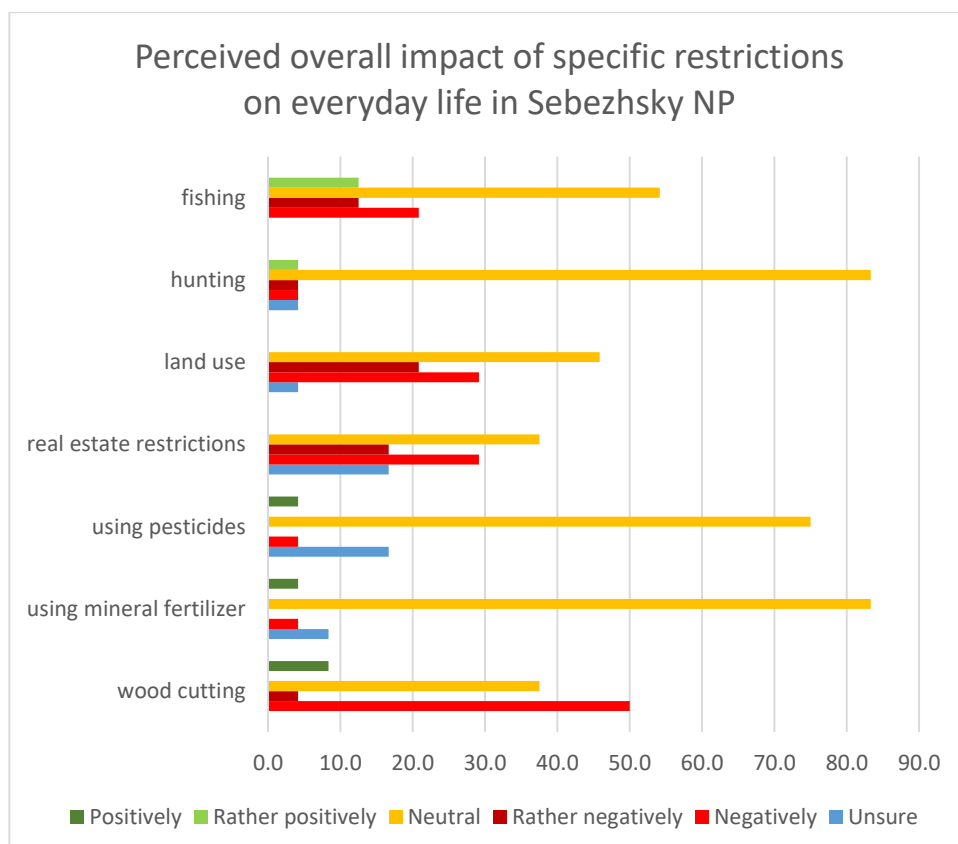

Graphical presentation of the answers to question no 8: How do following restrictions affect you?

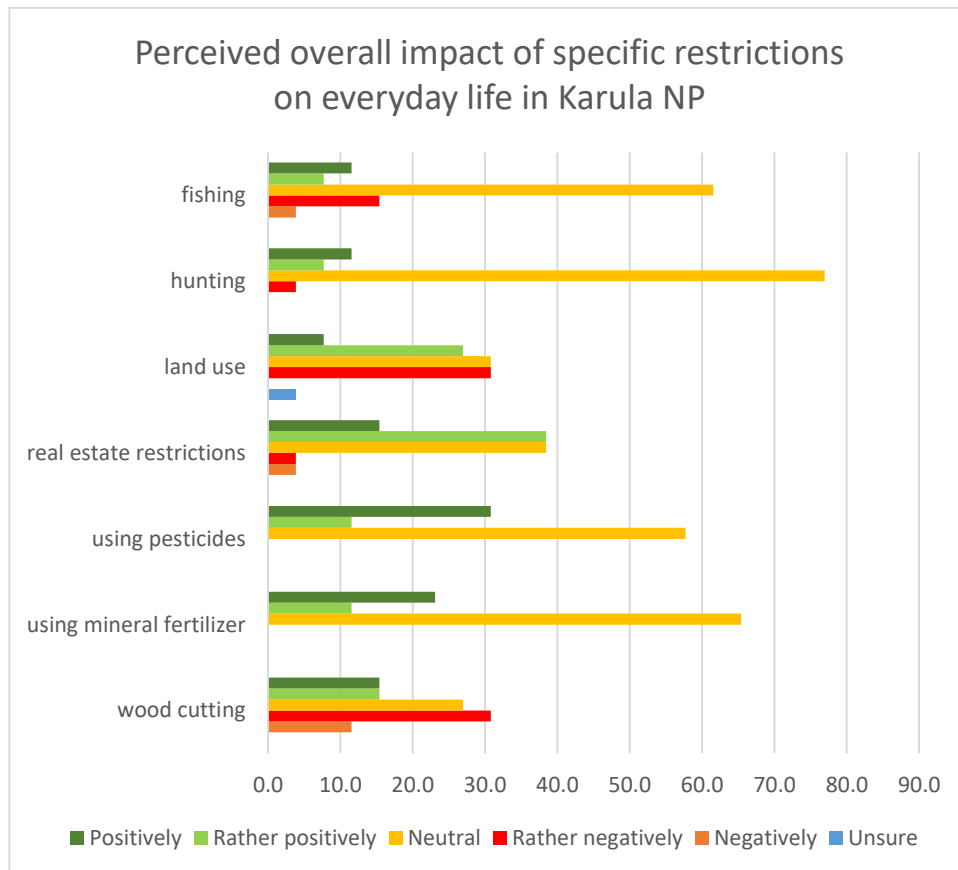

Graphical presentation of the answers to question no 8: How do following restrictions affect you?

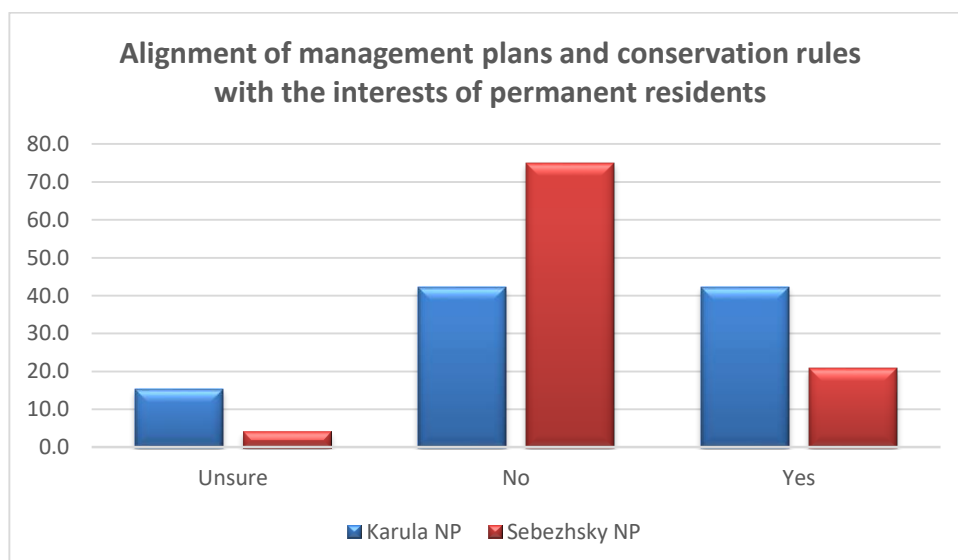

Graphical presentation of the answers to question no 9: Does protected area management plans and protection rules take enough consideration of the interests of permanent residents?

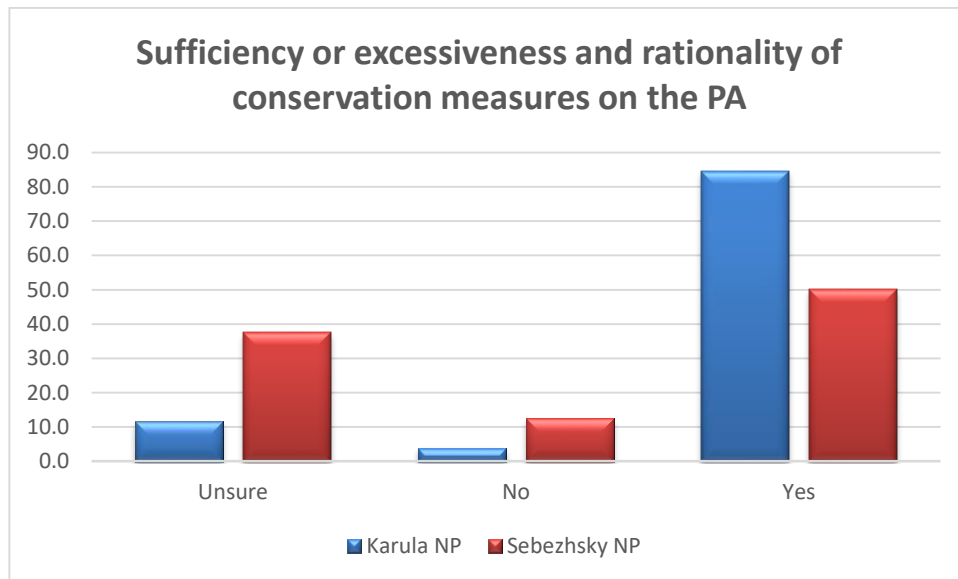

Graphical presentation of the answers to question no 10: What do you think if there is enough restrictions related to nature protection or not?

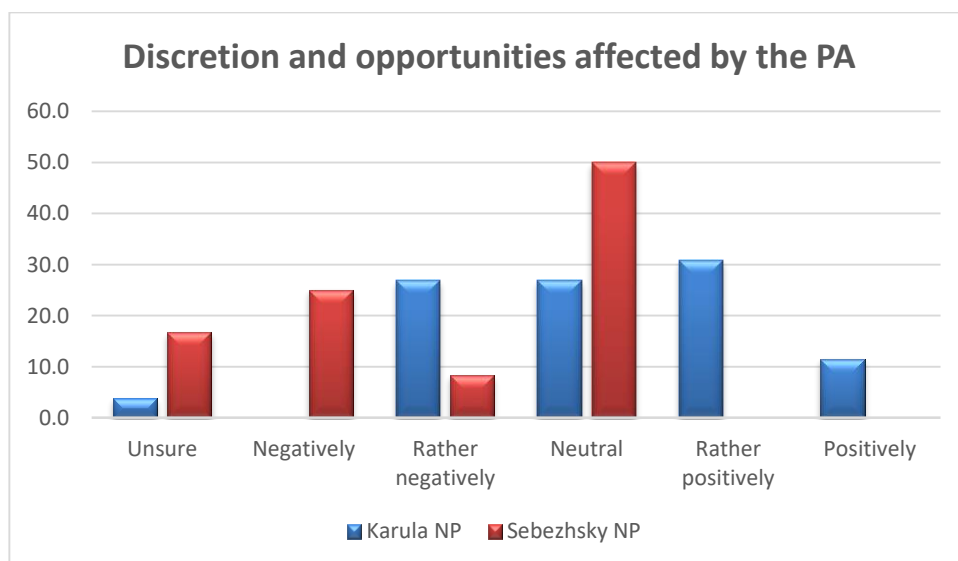

Graphical presentation of the answers to question no 11: How does residency in a protected area affect your discretion and opportunities?

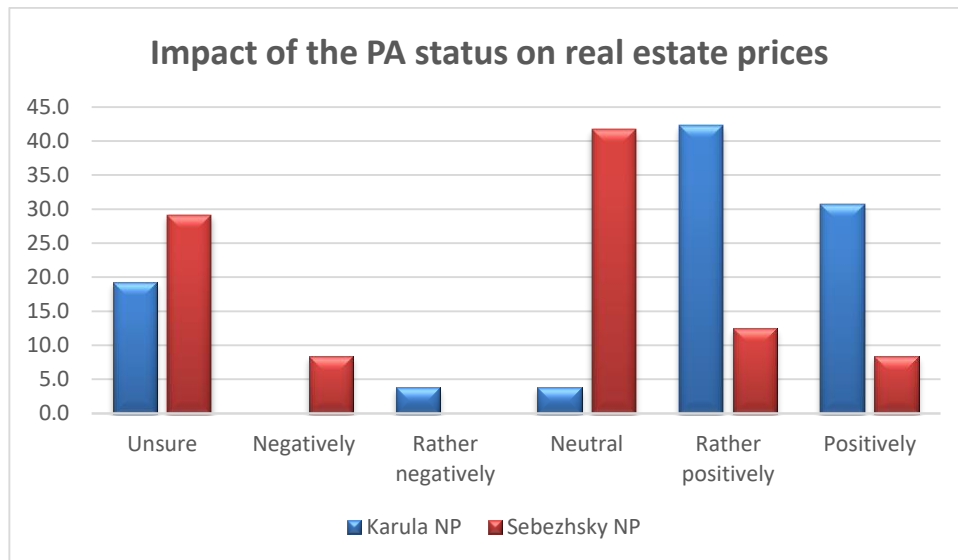

Graphical presentation of the answers to question no 13: How does location in protected area affect the price of real estate?

|                                                   | Overall ranking |          |
|---------------------------------------------------|-----------------|----------|
|                                                   | Karula          | Sebezhsy |
| Monetary compensation                             | 1               | 4        |
| The overall reduction of restrictions             | 6               | 5        |
| Reduction of restrictions for permanent residents | 3               | 1        |
| Complementary / alternative earning opportunities | 5               | 3        |
| Consultancy service                               | 4               | 6        |
| Compensatory measures (i.e road construction)     | 2               | 2        |

Graphical presentation of the answers to question no 14: If there are disadvantages caused by restrictions, how should these be compensated? Please rank the following list, marking the most important one with „1“.

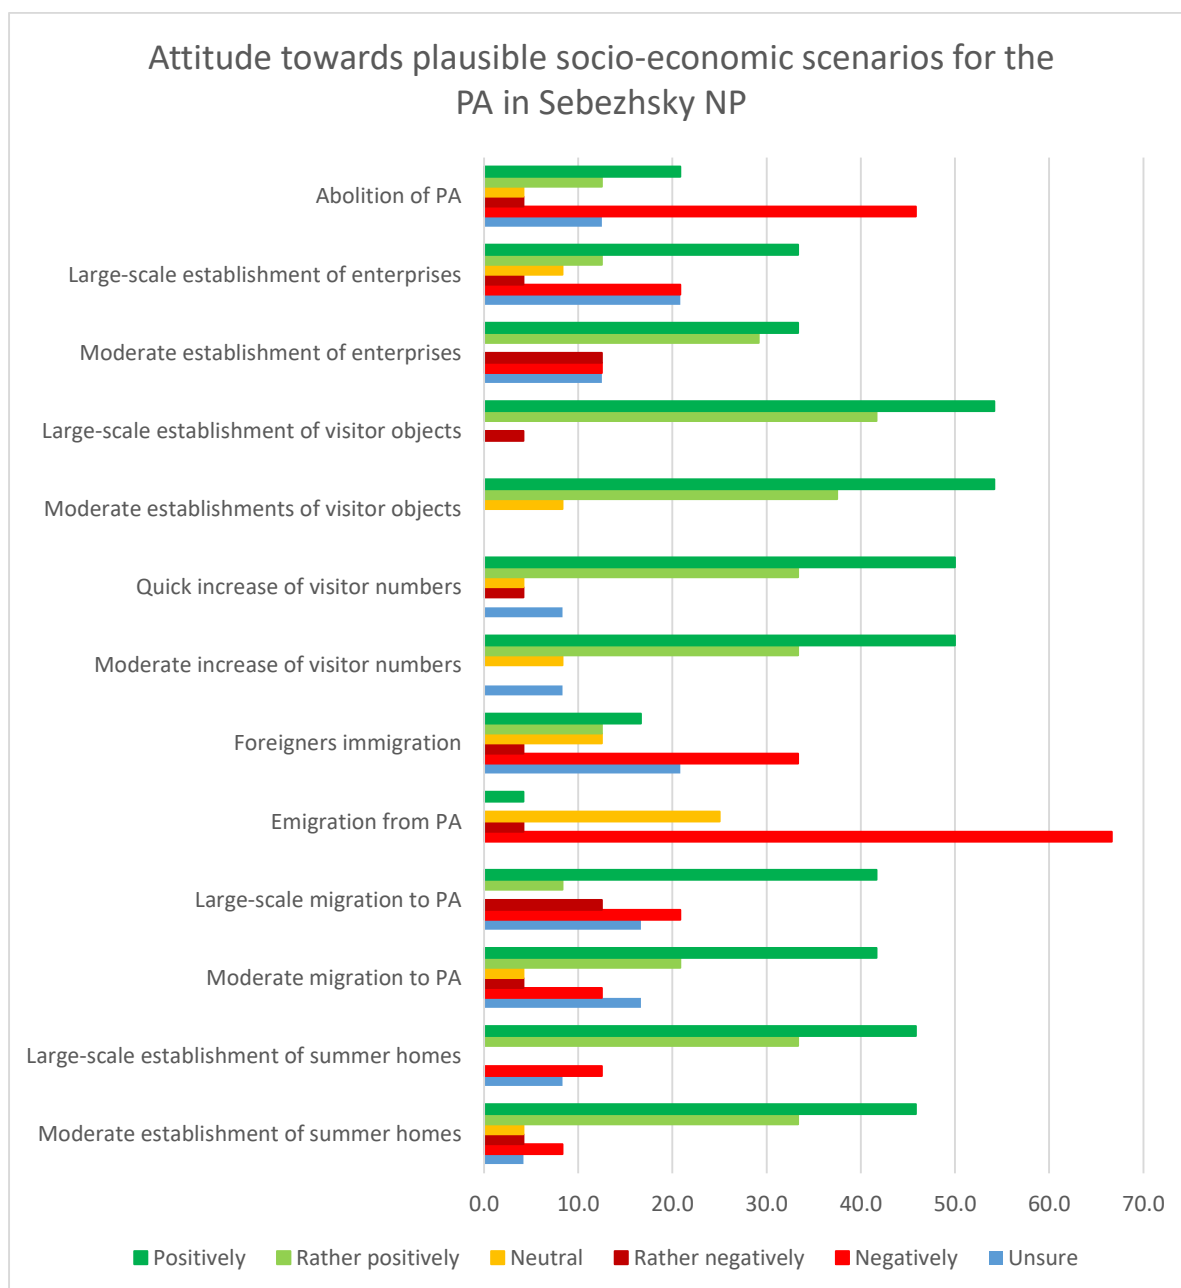

Graphical presentation of the answers to question no 15: How are you minded about possible changes (listed below) in the protected area?

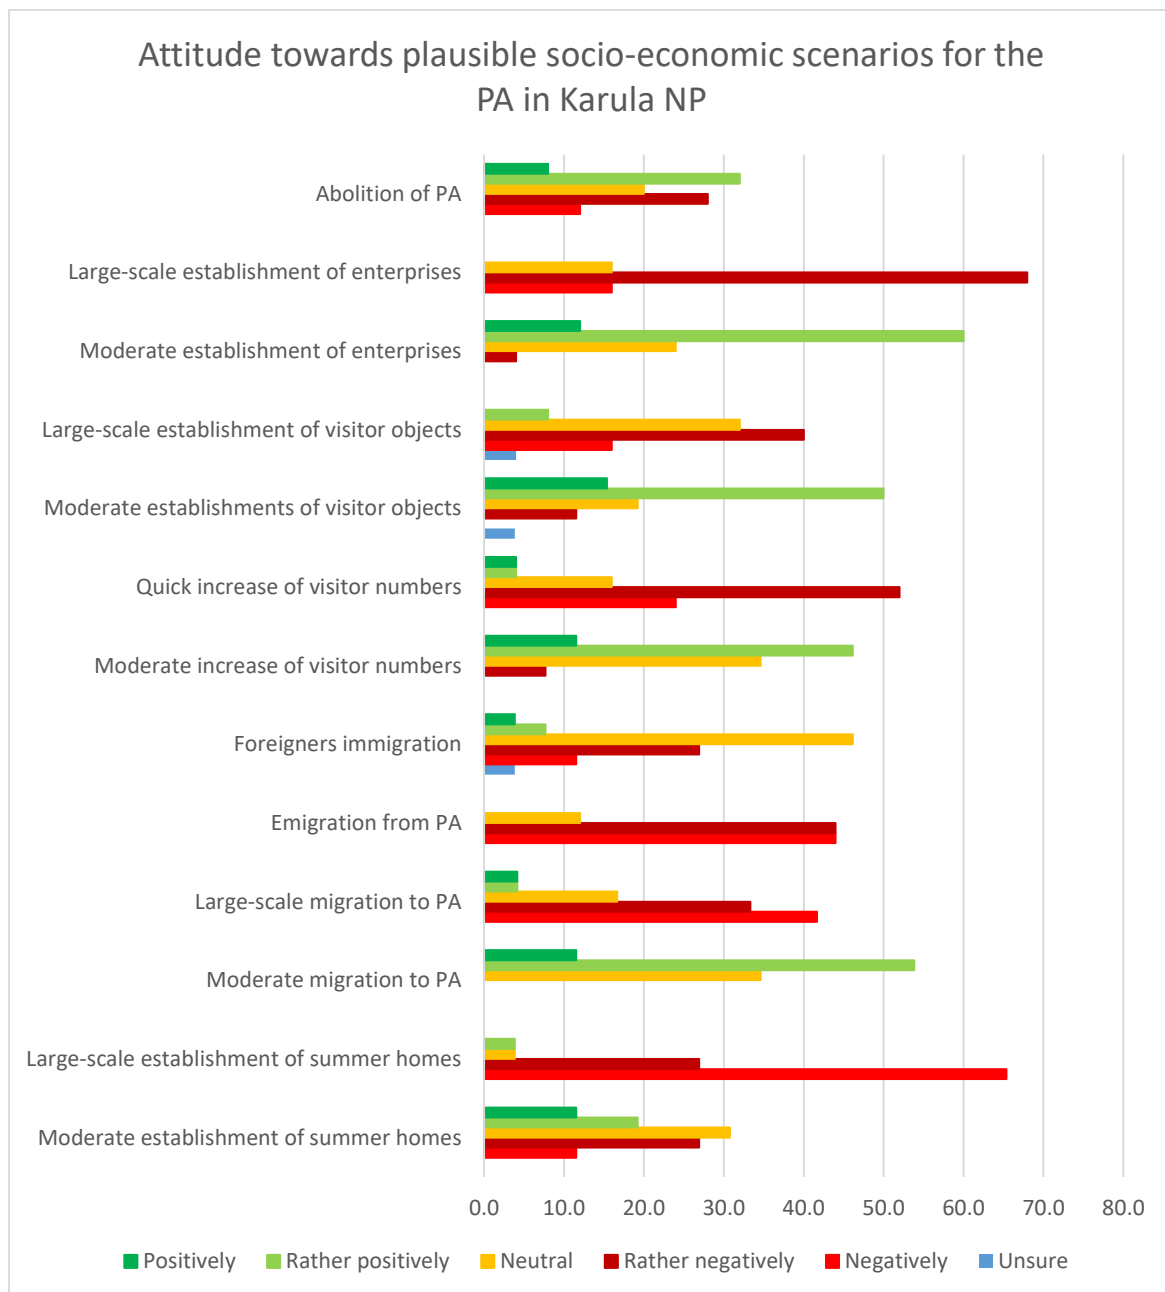

Graphical presentation of the answers to question no 15: How are you minded about possible changes (listed below) in the protected area?



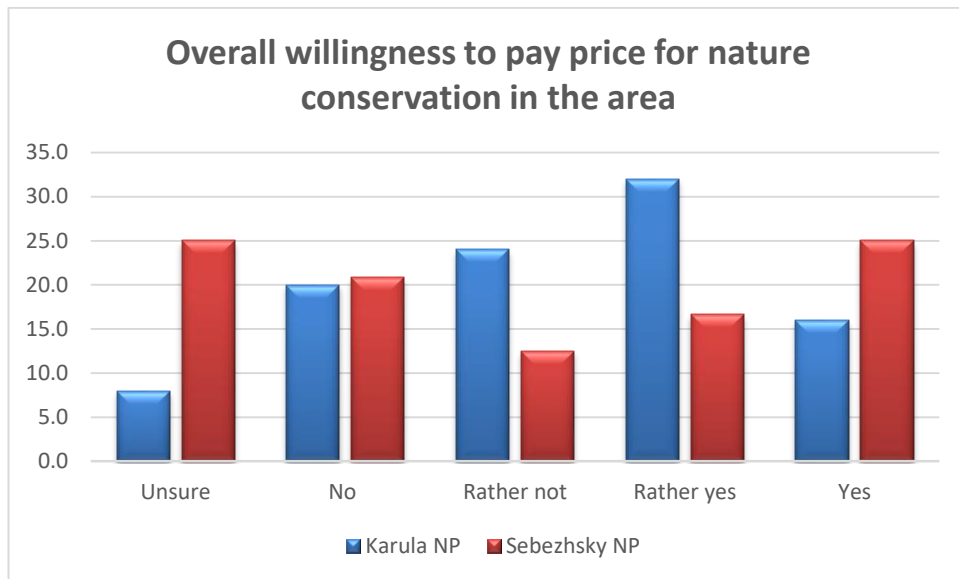

Graphical presentation of the answers to question no 16: Are you willing to pay higher prices on behalf of nature conservation/protection in your home region?

|                                                 | Overall ranking |          |
|-------------------------------------------------|-----------------|----------|
|                                                 | Karula          | Sebezhsy |
| Abandonment and overgrowth of agricultural land | 5               | 1        |
| Inappropriate buildings                         | 4               | 5        |
| Crumbling buildings                             | 2               | 4        |
| Deforestation                                   | 3               | 3        |
| Waste thrown into environment                   | 1               | 2        |

Graphical presentation of the answers to question no 17: Which factors do you find annoying in the landscapes of your home region? Please rank the list below, marking the most important one with „1“.

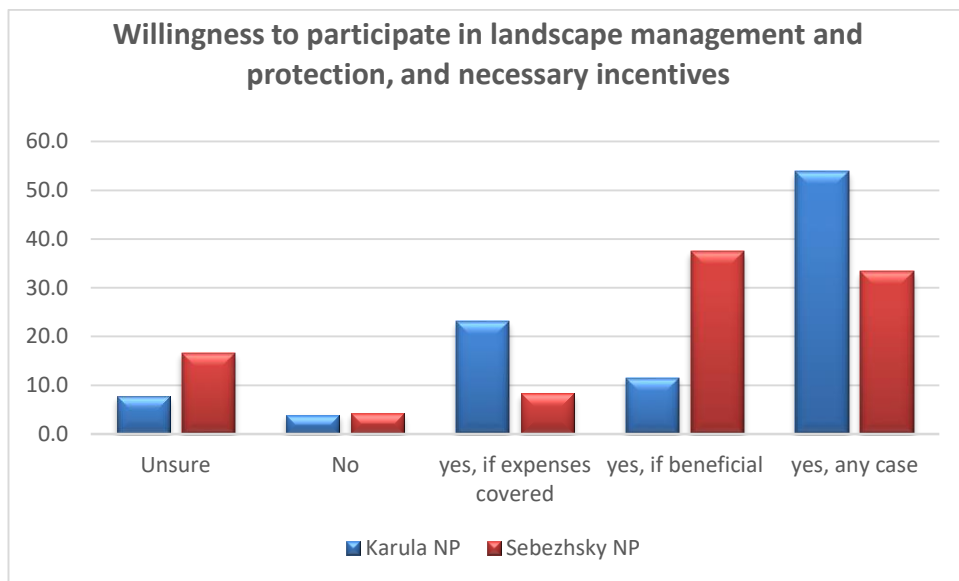

Graphical presentation of the answers to question no 19: Are you willing to take care/maintain landscape in your home region?

Perceived effectiveness of the existing system of subsidies and compensations, and desired changes to this system

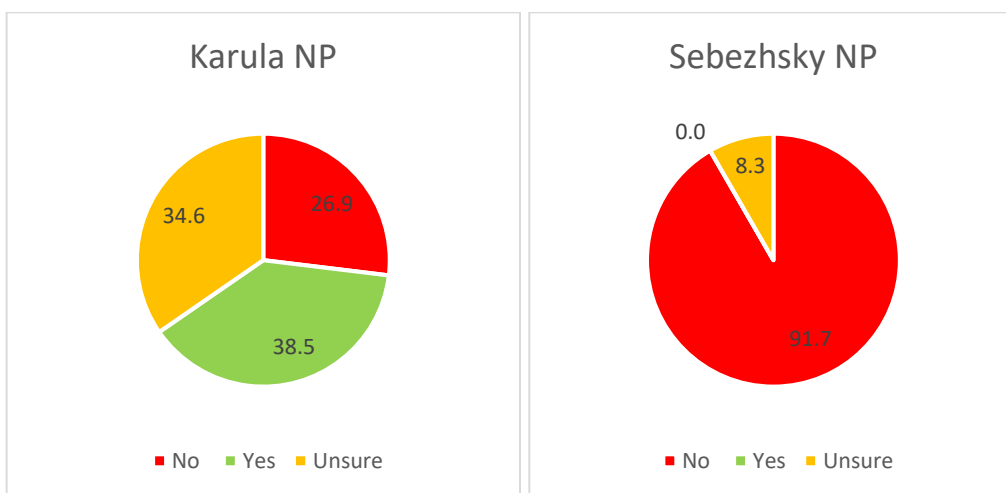

Graphical presentation of the answers to question no 20: Is the current system of subsidies effective / sufficient?

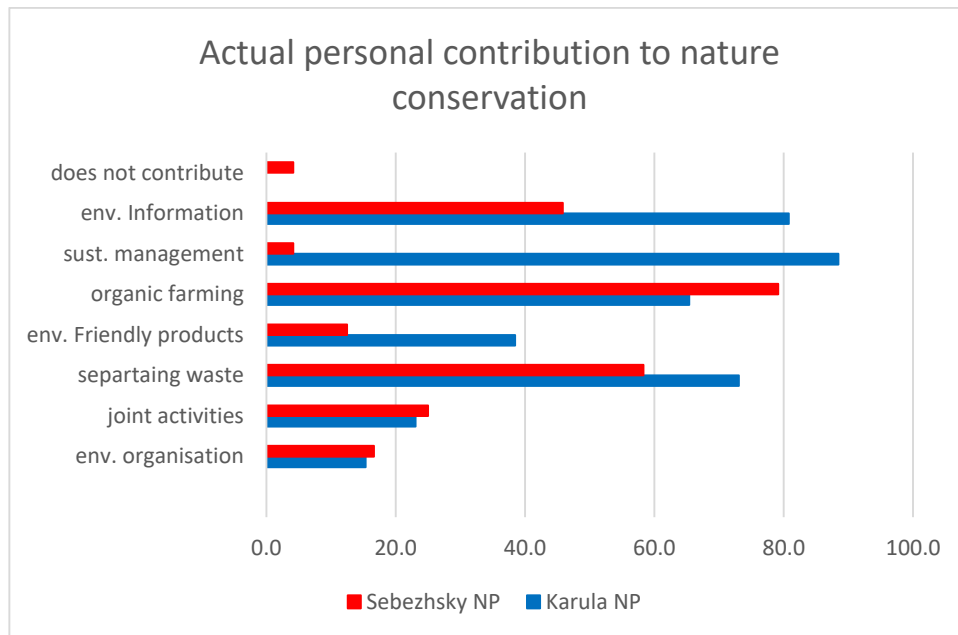

Graphical presentation of the answers to question no 21: How do you contribute to the nature/environment protection and conservation?

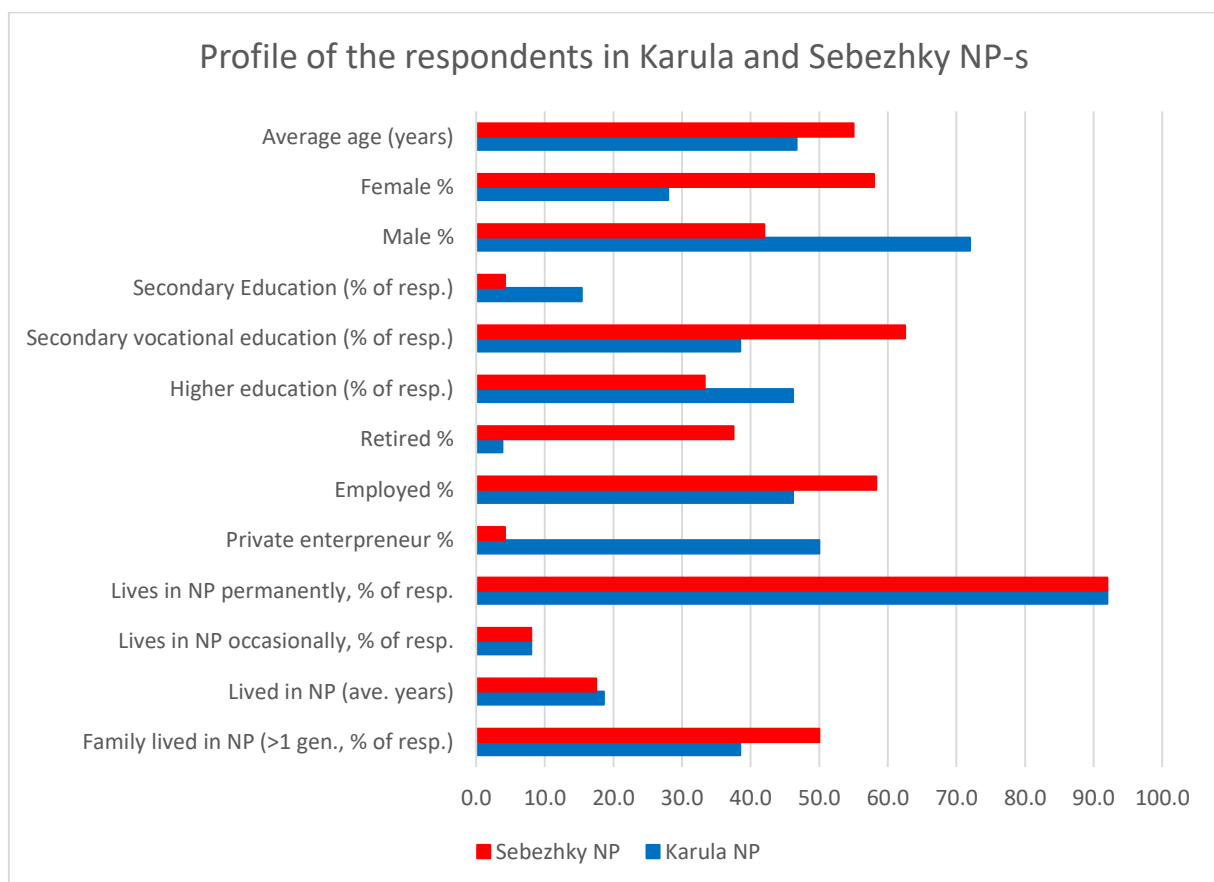

Graphical presentation of the answers to questions no 22-27: Overall duration of residence in the area; Duration of annual stays in the area; Age; Gender; Educational level; Employment information.
