# Supplementary material
Source: MDPI journal article supplement (https://www.mdpi.com/2073-445X/10/3/274)
Supplement: s1 [file s1]

### Survey: attitude to nature protection at home region

This questionnaire is translated into english from the original versions in estonian and in russian

1. Please rank the importance of the problems encountered in Estonia/Pskov Region, marking the most important one with „1“ .

- ☐ Unemployment
- ☐ Marginalization
- ☐ Criminality
- ☐ Problems related to nature- and environment protection
- ☐ Inflation
- ☐ Social problems
- ☐ Other 1:
- ☐ Other 2:

**Comments:**

2. Please rank the following list from the nature protection perspective, marking the most important one with „1“ .

- ☐ Wetlands (swamps,bogs etc.)
- ☐ Wooded meadows
- ☐ Coastal areas
- ☐ Old-growth/virgin/primeval forests
- ☐ Species under protection
- ☐ Natural monuments (single objects)
- ☐ Traditional landscapes

**Comments:**

3. What do You think of the amount/number/surface of protected areas in Estonia/Pskov Region?

| Too few | Rather few | Enough | Rather much | Too much |
|---------|------------|--------|-------------|----------|
|         |            |        |             |          |

| Unsure |
|--------|
|        |

**Comments:**

4. Do you like that your residence is located in a protected area?

|         |                |         |             |      |
|---------|----------------|---------|-------------|------|
| Dislike | Rather dislike | Neutral | Rather like | Like |
|         |                |         |             |      |

|        |
|--------|
| Unsure |
|        |

**Comments:**

5. Do your friends/family/acquaintances living elsewhere like that your residence is located in a protected area?

|         |                |         |             |      |
|---------|----------------|---------|-------------|------|
| Dislike | Rather dislike | Neutral | Rather like | Like |
|         |                |         |             |      |

|        |
|--------|
| Unsure |
|        |

**Comments:**

6. How do you rank nature/environment protection activities in your home region?

|          |                 |         |             |      |
|----------|-----------------|---------|-------------|------|
| Bad/poor | Rather bad/poor | Neutral | Rather good | Good |
|          |                 |         |             |      |

|        |
|--------|
| Unsure |
|        |

**Please explain your choice:**

7. Please rank your knowledge about nature protection rules and restrictions which are in force in your home region (How well do you know nature protection rules and restrictions which are in force in your home region? )

|          |                 |         |             |      |
|----------|-----------------|---------|-------------|------|
| Bad/poor | Rather bad/poor | Average | Rather good | Good |
|          |                 |         |             |      |

|        |
|--------|
| Unsure |
|        |

**Comments:**

8. How do following restrictions affect you?

|                                              | Negatively | Rather negatively | Neutral | Rather positively | Positively | Unsure |
|----------------------------------------------|------------|-------------------|---------|-------------------|------------|--------|
| a. Restrictions on wood cutting              |            |                   |         |                   |            |        |
| b. Restrictions on using mineral fertilizers |            |                   |         |                   |            |        |
| c. Restrictions on using pesticides          |            |                   |         |                   |            |        |

|                                        |  |  |  |  |  |  |
|----------------------------------------|--|--|--|--|--|--|
| d. Restrictions related to real estate |  |  |  |  |  |  |
| e. Restrictions on land use            |  |  |  |  |  |  |
| f. Restrictions on hunting             |  |  |  |  |  |  |
| g. Restrictions on fishing             |  |  |  |  |  |  |
| h. Other(please name):                 |  |  |  |  |  |  |

**Comments:**

9. Does protected area management plans and protection rules take enough consideration of the interests of permanent residents?

|    |     |        |
|----|-----|--------|
| No | Yes | Unsure |
|    |     |        |

**Comments:**

10. What do you think if there is enough restrictions related to nature protection or not?

|    |     |        |
|----|-----|--------|
| No | Yes | Unsure |
|    |     |        |

10 a. In your opinion, which restrictions are not rational?

**Please explain:**

10 b. Which additional restrictions would you like to apply?

**Please explain:**

11. How does residency in a protected area affect your discretion and opportunities?

|            |                   |         |                   |            |        |
|------------|-------------------|---------|-------------------|------------|--------|
| Negatively | Rather negatively | Neutral | Rather positively | Positively | Unsure |
|            |                   |         |                   |            |        |

**Please explain:**

12. Which institution/Who should be administrator of the protected area?

- ☐ State
- ☐ Local government
- ☐ NGO
- ☐ Private body
- ☐ Other:

**Comments:**

13. How does location in protected area affect the price of real estate?

| Negatively | Rather negatively | Neutral | Rather positively | Positively | Unsure |
|------------|-------------------|---------|-------------------|------------|--------|
|            |                   |         |                   |            |        |

**Comments:**

14. If there are disadvantages caused by restrictions, how should these be compensated? Please rank the following list, marking the most important one with „1“.

- ☐ Monetary compensation
- ☐ The overall reduction of restrictions
- ☐ Reduction of restrictions only for permanent residents
- ☐ Creation of complementary / alternative earning opportunities (new jobs; favouring entrepreneurship; tax exemptions etc).
- ☐ Consultations (advisory service; help with preparation of applications etc.)
- ☐ Compensatory measures (Kompensationsmaßnahmen (road construction, social services etc.)
- ☐ Other:

**Comments:**

15. How are you minded about possible changes (listed below) in the protected area?

|                                                                                     | Negatively | Rather negatively | Neutral | Rather positively | Positively | Unsure |
|-------------------------------------------------------------------------------------|------------|-------------------|---------|-------------------|------------|--------|
| a. Moderate establishment of summer homes                                           |            |                   |         |                   |            |        |
| b. Large-scale establishment of summer homes                                        |            |                   |         |                   |            |        |
| c. Moderate migration to protected area                                             |            |                   |         |                   |            |        |
| d. Large-scale migration to protected area                                          |            |                   |         |                   |            |        |
| e. Emigration from protected area                                                   |            |                   |         |                   |            |        |
| g. foreigners immigration                                                           |            |                   |         |                   |            |        |
| h. Moderate increase of visitor numbers                                             |            |                   |         |                   |            |        |
| i. Quick increase of visitor numbers                                                |            |                   |         |                   |            |        |
| j. Moderate establishment of visitor objects (hiking trails, tourism farms etc.)    |            |                   |         |                   |            |        |
| k. Large-scale establishment of visitor objects (hiking trails, tourism farms etc.) |            |                   |         |                   |            |        |
| l. Moderate establishment of businesses /enterprises                                |            |                   |         |                   |            |        |
| m. Large-scale establishment of businesses /enterprises                             |            |                   |         |                   |            |        |
| n. Abolition of protected area                                                      |            |                   |         |                   |            |        |

**Comments:**

16. Are you willing to pay higher prices on behalf of nature conservation/protection in your home region?

| No | Rather not | Rather yes | Yes |
|----|------------|------------|-----|
|    |            |            |     |

| Unsure |
|--------|
|        |

**Comments:**

17. Which factors do you find annoying in the landscapes of your home region?  
Please rank the list below, marking the most important one with „1“.

- ☐ Abandonment and overgrowth of agricultural land
- ☐ Inappropriate buildings
- ☐ Crumbling buildings
- ☐ Deforestation
- ☐ Waste thrown into environment
- ☐ Other:

**Comments:**

18. Please point out the things you find valuable in the landscapes of your home region:

19. Are you willing to take care/maintain landscape in your home region?

|    |                                     |                             |                          |
|----|-------------------------------------|-----------------------------|--------------------------|
| No | Yes, if expenses<br>will be covered | Yes, if it is<br>beneficial | Yes, I'am in<br>any case |
|    |                                     |                             |                          |

|        |
|--------|
| Unsure |
|        |

**Comments:**

20. Is the current system of subsidies effective / sufficient?

|    |     |
|----|-----|
| No | Yes |
|    |     |

|        |
|--------|
| Unsure |
|        |

**Comments:**

20 a. What would you like to change in current system of subsidies and which kind of subsidies should be applied additionally (training, counseling, financial support etc.)?

21. How do you contribute to the nature/environment protection and conservation?

- ☐ I am a member of an environmental organisation
- ☐ I take actively part of joint activities related to environment protection (i.e. joint cleaning/building operations etc.) .
- ☐ I collect waste separately (recyclable waste, biological waste, hazardous waste etc.).
- ☐ I buy environmentally friendly products
- ☐ I practise organic farming
- ☐ I'm trying to follow the principles of sustainable management
- ☐ I try to keep myself informed about environmental issues
- ☐ I do not contribute nature/environment protection and conservation
- ☐ Other:

**Comments:**

22. How long have you lived in this region?

- ☐ Up to 1 year  
\_\_\_\_\_ years
- ☐ Several generations

23. How many months per year do you live in protected area?

- \_\_\_\_\_ months
- ☐ Year round

24. Your age? \_\_\_\_\_ years

25. Your sex?

- ☐ Male
- ☐ Female

26. Your level of education:

- ☐ Basic education
- ☐ Secondary education
- ☐ Vocational secondary education
- ☐ Higher education

27. What is your employment (job)?

- ☐ \_\_\_\_\_
- ☐ Unemployed
- ☐ Pensioner

**Thank you very much for answering the survey!**
